# Supplementary material
Source: MDPI journal article supplement (https://www.mdpi.com/2410-3888/7/5/280)
Supplement: s1 [file s1]

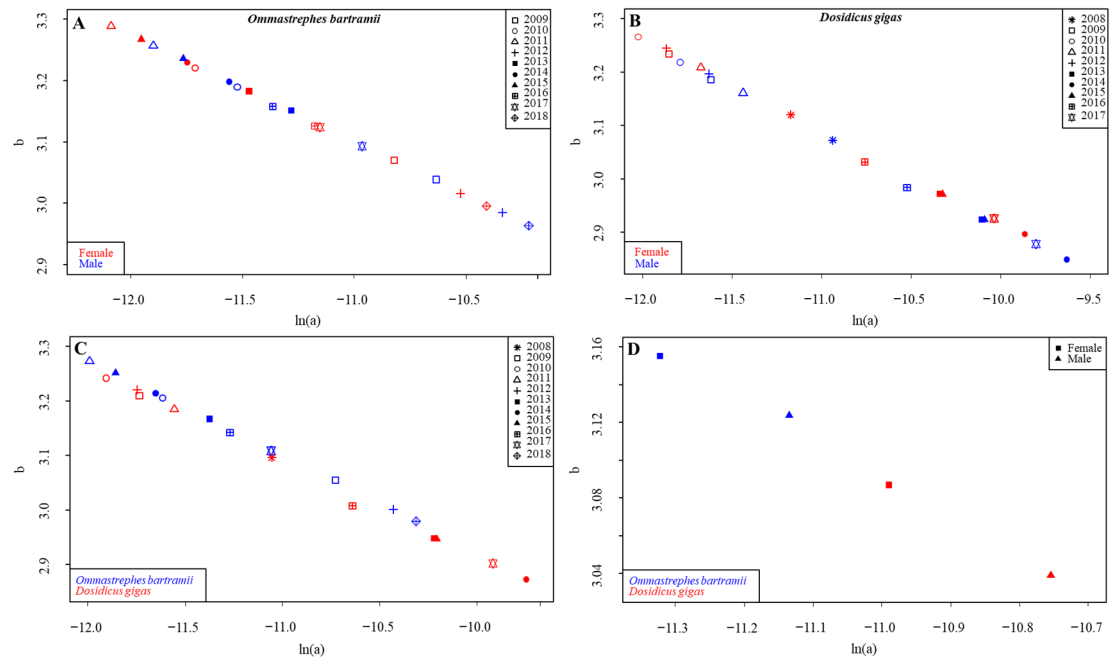

Figure S1. Variations of  $a$  and  $b$  among years and sexes from the LMEM (Y&S.I&S). A and B: estimates of parameter  $a$  and  $b$  with random effects of both years and sexes. C: temporal variations of  $\ln(a)$  and  $b$ . D: Sexual variations of  $\ln(a)$  and  $b$ .
